# Supplementary material
Source: PubMed Central journal article supplement (PMC10354764)
Supplement: ocad012_supplementary_data.pdf [file ocad012_supplementary_data.pdf]

## APPENDIX

### Extended Error Analysis

Figures 7-9 present the performance by the number of gold events per note for a given event type (referred to as *event density*): one (1), two (2), and three or more (3+) events per note. These figures also includes the total number of gold events (+).

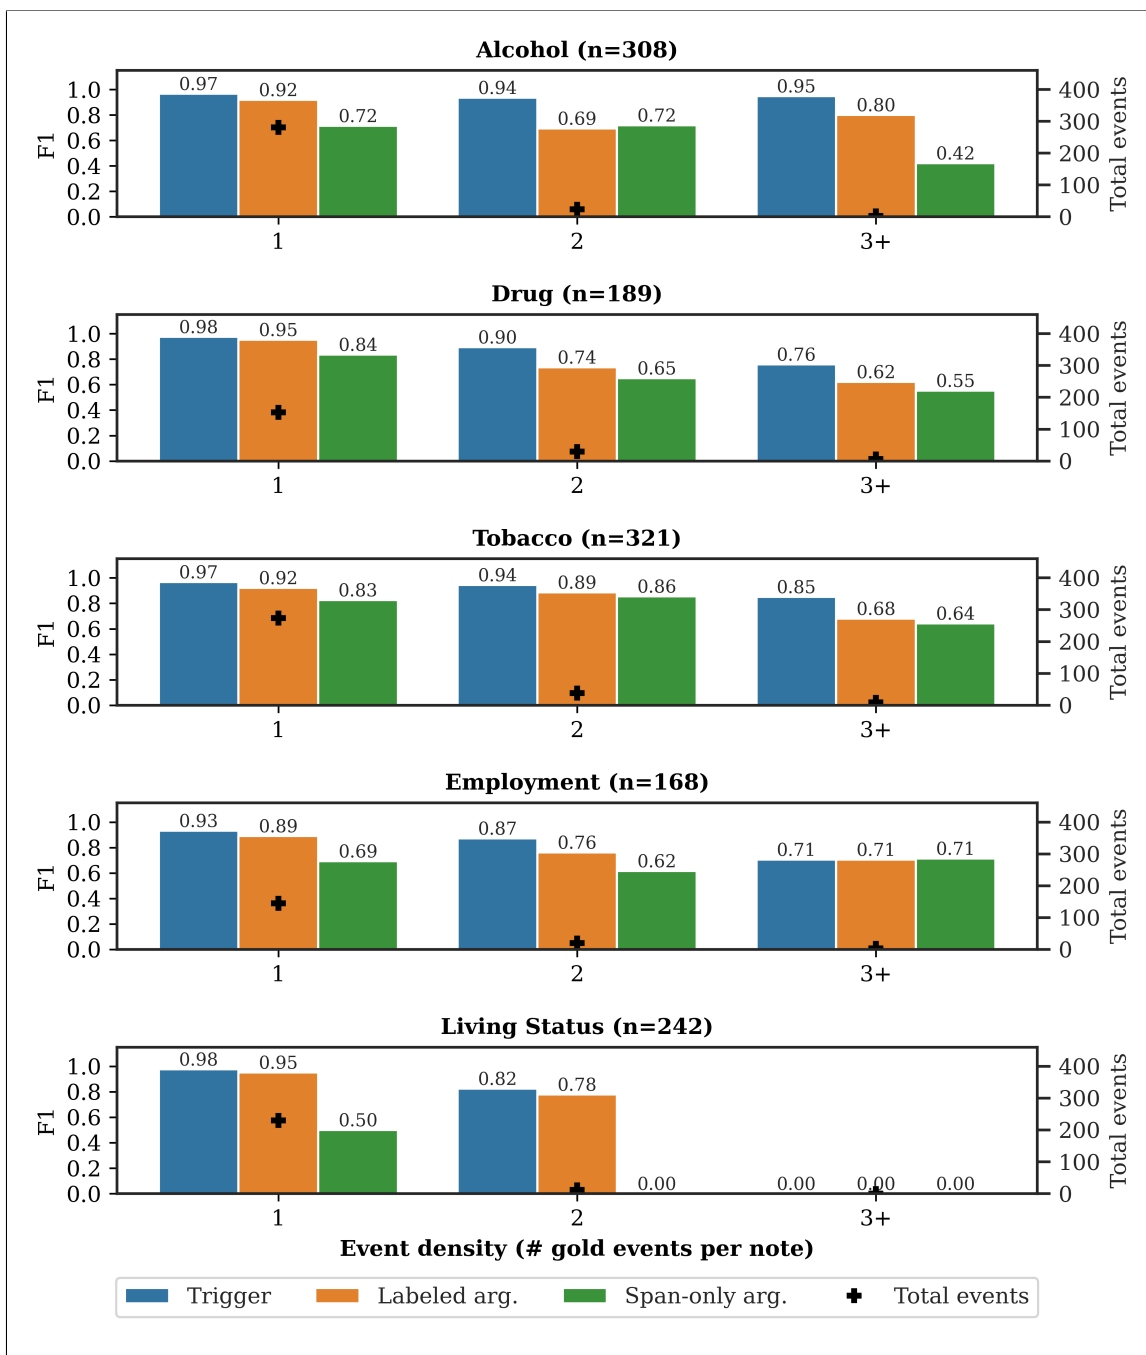

Figure 7: Performance breakdown by event density for Subtask A ( $D_{test}^{mimic}$ ). The left-hand y-axis is the micro-averaged F1 for triggers, labeled arguments, and span-only arguments (vertical bars). The right-hand y-axis is the total number of gold events (+).

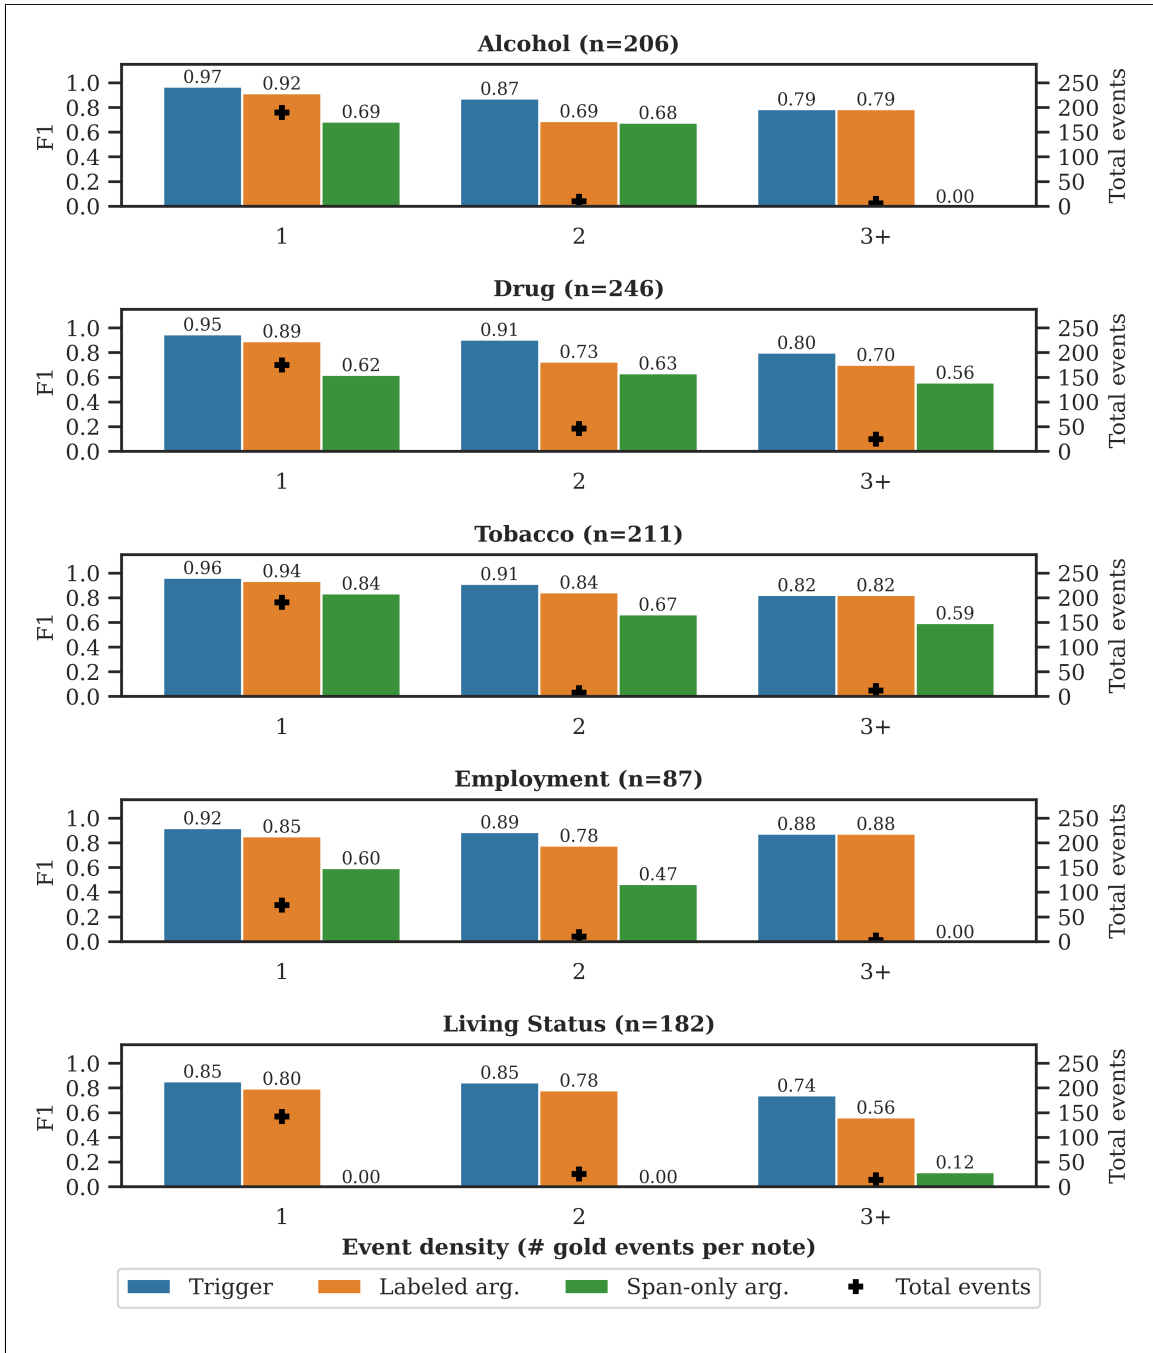

Figure 8: Performance breakdown by event density for Subtask B ( $D_{dev}^{uw}$ ). The left-hand y-axis is the micro-averaged F1 for triggers, labeled arguments, and span-only arguments (vertical bars). The right-hand y-axis is the total number of gold events (+).

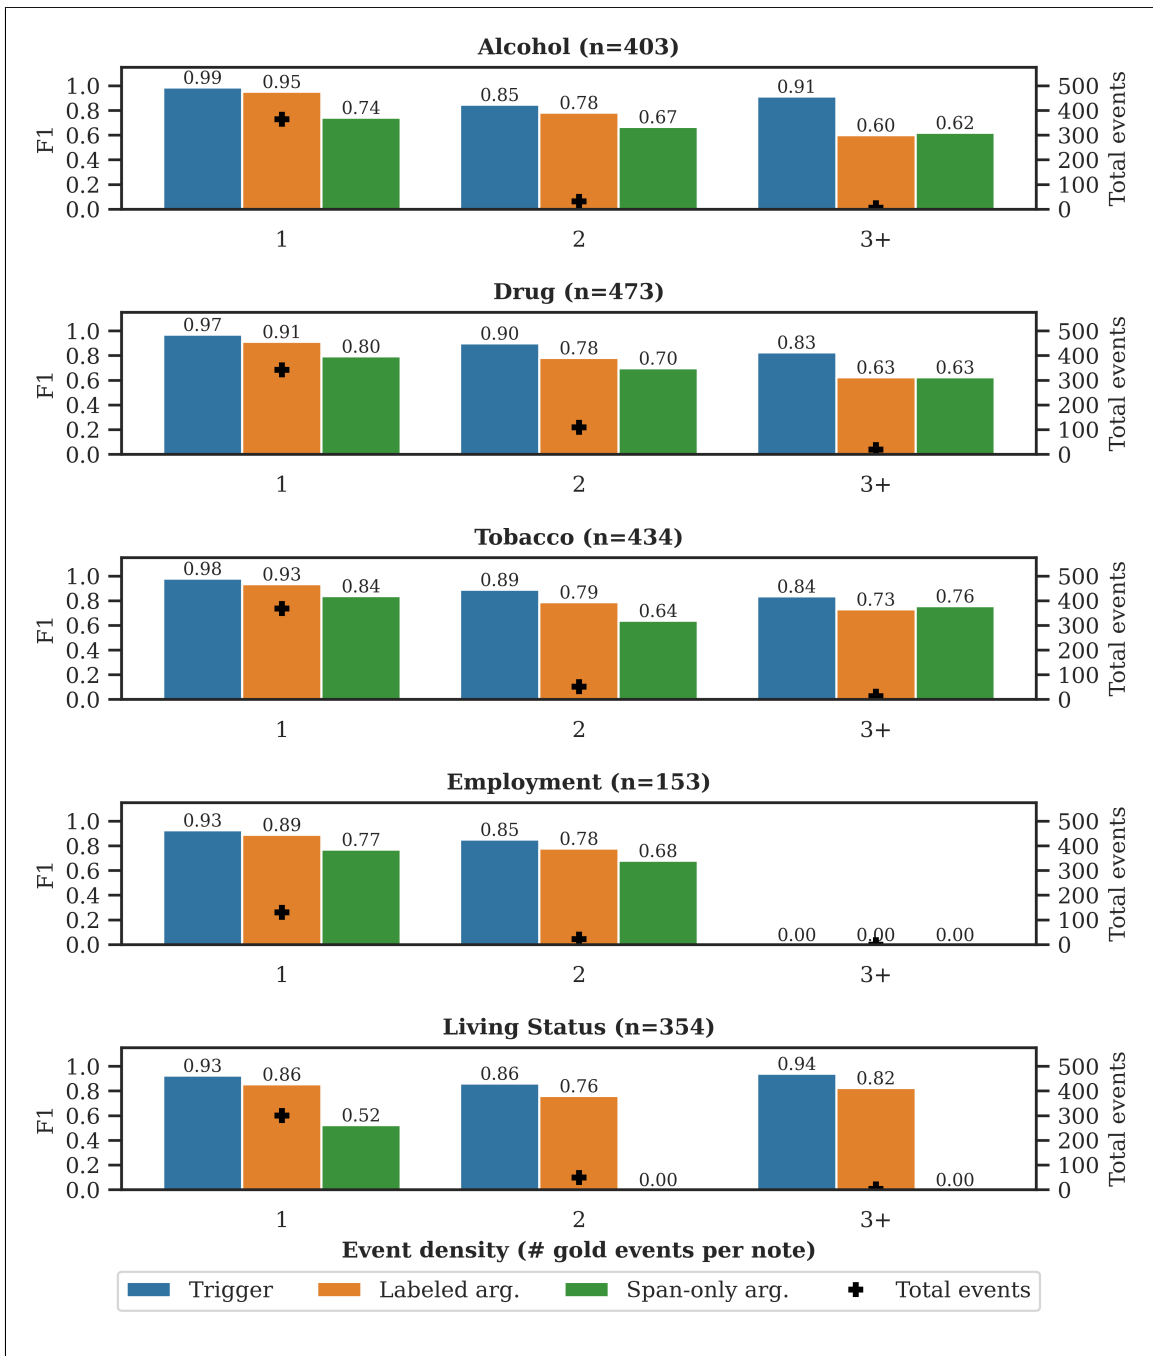

Figure 9: Performance breakdown by event density for Subtask C ( $D_{test}^{uw}$ ). The left-hand y-axis is the micro-averaged F1 for triggers, labeled arguments, and span-only arguments (vertical bars). The right-hand y-axis is the total number of gold events (+).
